# Supplementary material for: Effects of Cadmium on Physiochemistry and Bioactive Substances of Muskmelon (Cucumis melo L.)
Source: MDPI journal article supplement (doi:10.3390/molecules27092913), 2022-05-03
Supplement: s1 [file s1]

*Table S.1 Physical and chemical properties of soil*

| Available Nitrogen<br>(mg/kg) | Available Phosphorus<br>(mg/kg) | Available Potassium<br>(mg/kg) |
|-------------------------------|---------------------------------|--------------------------------|
| 48.84                         | 158.92                          | 1775.42                        |

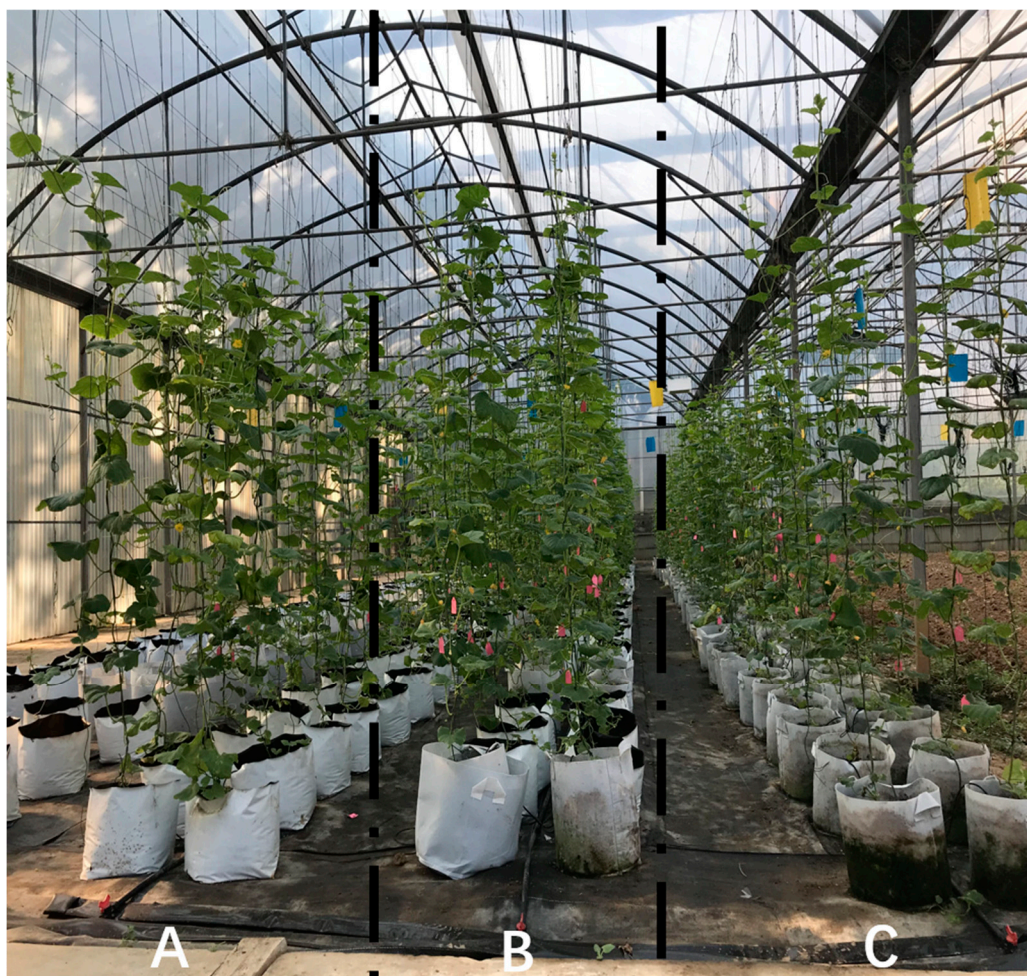

Figure S.1 A, B and C were was 200 mg /kg Cd, 50 mg /kg Cd and untreated melon (control group)

Table S.2 Single factor experiment results of ethanol concentration

| Ethanol concentration | Polyphenols (mg/g) | Flavonoids (mg/g) | Saponin (mg/g) | Polysaccharides (mg/g) |
|-----------------------|--------------------|-------------------|----------------|------------------------|
| 20%                   | 0.26 E-03          | 0.063             | 0.087          | 181.188                |
| 30%                   | 0.42 E-03          | 0.052             | 0.060          | 209.297                |
| 40%                   | 0.75 E-03          | 0.054             | 0.049          | 115.240                |
| 50%                   | 2.47 E-03          | 0.115             | 0.041          | 97.947                 |
| 60%                   | 2.90 E-03          | 0.116             | 0.036          | 45.272                 |
| 70%                   | 4.17 E-03          | 0.154             | 0.039          | 67.773                 |
| 80%                   | 4.61 E-03          | 0.171             | 0.040          | 39.215                 |
| 95%                   | 5.42 E-03          | 0.204             | 0.068          | 32.295                 |

Table S.3 Extract temperature single factor experiment results

| Temperature (°C) | Polyphenols (mg/g) | Flavonoids (mg/g) | Saponin (mg/g) | Polysaccharides (mg/g) |
|------------------|--------------------|-------------------|----------------|------------------------|
| 30               | 3.90 E-03          | 0.190             | 0.088          | 40.873                 |
| 40               | 3.80 E-03          | 0.198             | 0.085          | 47.109                 |
| 50               | 4.32 E-03          | 0.250             | 0.096          | 50.699                 |
| 60               | 4.36 E-03          | 0.251             | 0.093          | 43.894                 |
| 70               | 4.95 E-03          | 0.276             | 0.118          | 34.534                 |
| 80               | 7.55 E-03          | 0.323             | 0.133          | 53.344                 |
| 90               | 3.91 E-03          | 0.190             | 0.074          | 42.024                 |

Table S.4 Single factor experiment results of material-liquid ratio

| material-liquid ratio | Polyphenols (mg/g) | Flavonoids (mg/g) | Saponin (mg/g) | Polysaccharides (mg/g) |
|-----------------------|--------------------|-------------------|----------------|------------------------|
| 1:10                  | 1.50 E-03          | 0.092             | 0.025          | 14.392                 |
| 1:20                  | 1.58 E-03          | 0.127             | 0.040          | 13.086                 |
| 1:30                  | 1.80 E-03          | 0.131             | 0.045          | 23.648                 |
| 1:40                  | 2.72 E-03          | 0.172             | 0.064          | 59.516                 |
| 1:50                  | 2.79 E-03          | 0.171             | 0.059          | 60.943                 |

Table S.5 Extraction time single factor experiment results

| Time (h) | Polyphenols (mg/g) | Flavonoids (mg/g) | Saponin (mg/g) | Polysaccharides (mg/g) |
|----------|--------------------|-------------------|----------------|------------------------|
| 0.5      | 3.99 E-03          | 0.177             | 0.055          | 42.871                 |
| 1        | 3.80 E-03          | 0.173             | 0.056          | 30.548                 |

|   |           |       |       |        |
|---|-----------|-------|-------|--------|
| 2 | 4.40 E-03 | 0.201 | 0.064 | 42.349 |
| 3 | 4.59 E-03 | 0.208 | 0.060 | 48.031 |
| 4 | 4.78 E-03 | 0.213 | 0.063 | 47.346 |
| 5 | 5.35 E-03 | 0.234 | 0.067 | 26.108 |

Table S.6 Orthogonal test results of extraction of polyphenols, flavonoids, saponins and polysaccharides from muskmelon pedicel

| number | A | B | C | D | Polyphenols<br>(mg/g) | Flavonoids<br>(mg/g) | Saponin<br>(mg/g) | Polysaccharides<br>(mg/g) | Comprehensive<br>score |
|--------|---|---|---|---|-----------------------|----------------------|-------------------|---------------------------|------------------------|
| 1      | 1 | 1 | 1 | 1 | 4.73 E-03             | 0.226                | 0.044             | 39.915                    | 192.548                |
| 2      | 1 | 2 | 2 | 2 | 6.07 E-03             | 0.249                | 0.044             | 36.670                    | 223.619                |
| 3      | 1 | 3 | 3 | 3 | 5.42 E-03             | 0.237                | 0.066             | 35.763                    | 221.699                |
| 4      | 2 | 1 | 2 | 3 | 6.72 E-03             | 0.287                | 0.071             | 49.398                    | 266.832                |
| 5      | 2 | 2 | 3 | 1 | 4.83 E-03             | 0.201                | 0.089             | 56.686                    | 217.350                |
| 6      | 2 | 3 | 1 | 2 | 4.47 E-03             | 0.197                | 0.041             | 44.570                    | 177.597                |
| 7      | 3 | 1 | 3 | 2 | 4.37 E-03             | 0.220                | 0.067             | 69.791                    | 204.297                |
| 8      | 3 | 2 | 1 | 3 | 5.39 E-03             | 0.243                | 0.084             | 94.279                    | 244.581                |
| 9      | 3 | 3 | 2 | 1 | 5.79 E-03             | 0.244                | 0.057             | 85.883                    | 233.892                |

Table S.7 Intuitive analysis of orthogonal test results of extraction of medicinal components from muskmelon

|    | Polyphenols (mg/g) |          |          |          | Flavonoids (mg/g) |       |       |       |
|----|--------------------|----------|----------|----------|-------------------|-------|-------|-------|
|    | A                  | B        | C        | D        | A                 | B     | C     | D     |
| k1 | 5.40E-03           | 5.30E-03 | 4.90E-03 | 5.10E-03 | 0.237             | 0.244 | 0.222 | 0.224 |
| k2 | 5.30E-03           | 5.40E-03 | 6.20E-03 | 5.00E-03 | 0.228             | 0.231 | 0.260 | 0.222 |
| k3 | 5.20E-03           | 5.20E-03 | 4.90E-03 | 5.80E-03 | 0.235             | 0.226 | 0.219 | 0.255 |
| R  | 2.20E-04           | 2.00E-04 | 1.30E-03 | 8.70E-04 | 0.009             | 0.018 | 0.041 | 0.034 |

Continued

| Saponin (mg/g) |       |       |       | Polysaccharides (mg/g) |        |        |        | Comprehensive score |         |         |         |
|----------------|-------|-------|-------|------------------------|--------|--------|--------|---------------------|---------|---------|---------|
| A              | B     | C     | D     | A                      | B      | C      | D      | A                   | B       | C       | D       |
| 0.051          | 0.061 | 0.056 | 0.063 | 37.450                 | 53.034 | 59.588 | 60.828 | 212.622             | 221.226 | 204.909 | 214.597 |
| 0.067          | 0.072 | 0.057 | 0.051 | 50.218                 | 62.545 | 57.317 | 50.344 | 220.593             | 228.517 | 241.448 | 201.838 |
| 0.070          | 0.055 | 0.074 | 0.074 | 83.317                 | 55.406 | 54.080 | 59.813 | 227.590             | 211.063 | 214.449 | 244.371 |
| 0.018          | 0.018 | 0.018 | 0.023 | 45.868                 | 9.511  | 5.508  | 10.484 | 14.968              | 17.454  | 36.539  | 42.533  |

K1,k2,k3 represents the average yield at a certain level under a certain factor, respectively. R represents range. A, B, C and D represent ethanol concentration, temperature, liquid-solid ratio and time, respectively
